# Supplementary material
Source: PubMed Central journal article supplement (PMC4694591)
Supplement: NIHMS741534-supplement-Supplemental_information.pdf [file NIHMS741534-supplement-Supplemental_information.pdf]

## Supplementary information

**Figure S1. Growth of *E. coli* EC93 strains in the presence of proteinase K.** *E. coli* EC93 strains were cultured in TB medium at 37 °C with shaking and growth monitored by measuring the optical density at 600 nm (OD). Where indicated, the culture medium was supplemented with 20 µg mL<sup>-1</sup> of freshly prepared proteinase K.

**Figure S2. *E. coli* EC93  $\Delta cdiA$  mutants do not have growth or motility defects.** **A)** *E. coli* EC93 *cdiA*<sup>+</sup> and  $\Delta cdiA$  mutants were cultured in tryptone broth supplemented with 0.5% glycerol at 37 °C with shaking and growth monitored by measuring the optical density at 600 nm. **B)** *E. coli* EC93 *cdiA*<sup>+</sup> and  $\Delta cdiA$  mutants were seeded at the center of 0.4% agar swim plates and incubated at 37 °C for 12 h. **C)** Cell mobility was measured as the radius of migration in cm and the average  $\pm$  SEM presented. **D)** *E. coli* EC93 *cdiA*<sup>+</sup> and  $\Delta cdiA$  mutants were harvested from biofilms after 2 h of incubation on polystyrene plates and total RNA isolated for real time-quantitative PCR analysis of *fliC*, *pgaA*, *bcsA* and *wcaA* transcript levels. The average  $\pm$  SEM is presented for three independent replicates.

**Figure S3. Forward scatter analysis of strains expressing CdiA<sup>EC93</sup> truncation and deletion constructs.** Strains CH9604 (*bamA*<sup>E<sub>CO</sub></sup>) and CH9591 (*bamA*<sup>E<sub>CL</sub></sup>) that carry pTNC-WEB (CDI<sup>-</sup>) or the indicated CDI expression constructs were grown in LB medium and analyzed by flow cytometry for forward scatter.

**Figure. S4. Alignment of CdiA<sup>EC93</sup> and CdiA<sup>E264</sup> proteins.** CdiA<sup>EC93</sup> (Uniprot: Q3YL96) and CdiA<sup>E264</sup> (Q2SV12) were aligned using Clustal Omega on the Uniprot web server (<http://www.uniprot.org/align/>) and the alignment rendered with Jalview. The TPS transport domains are indicated for each protein. The VENN and ELYN peptide motifs that demarcate the toxin CdiA-CT regions are depicted in red font.

Figure S1

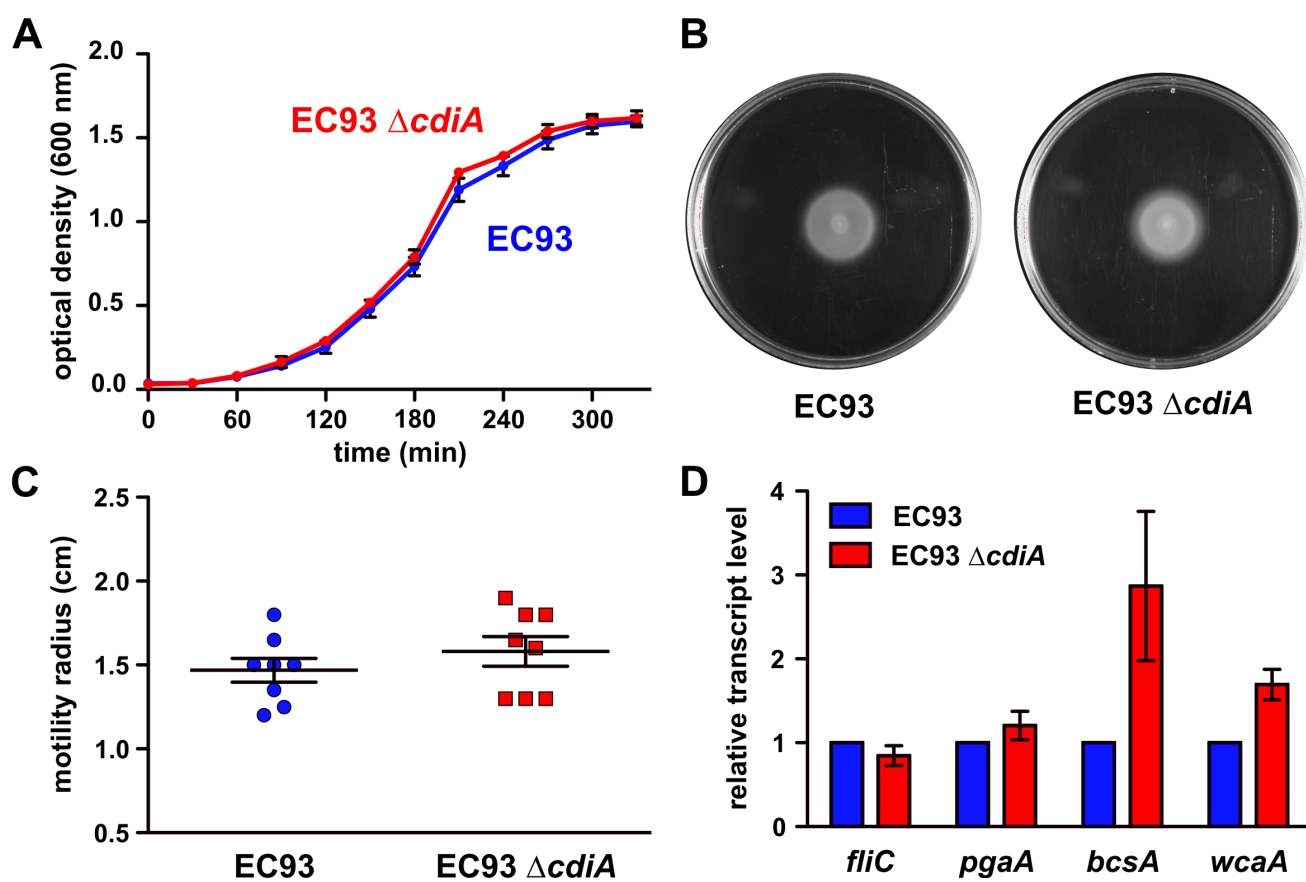

Figure S2

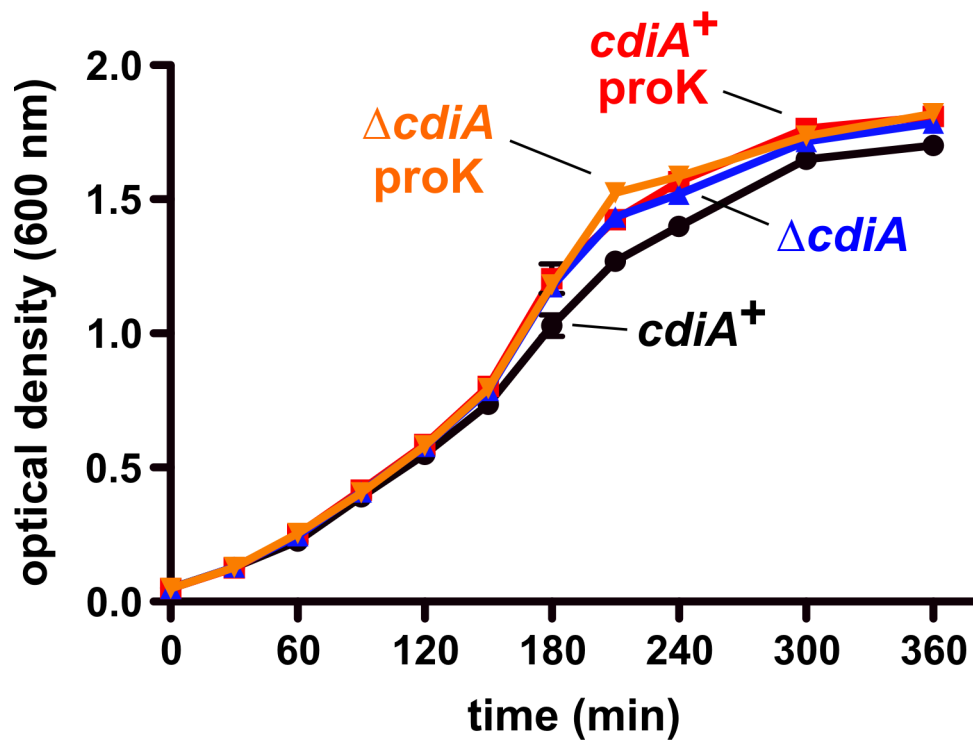

Figure S3

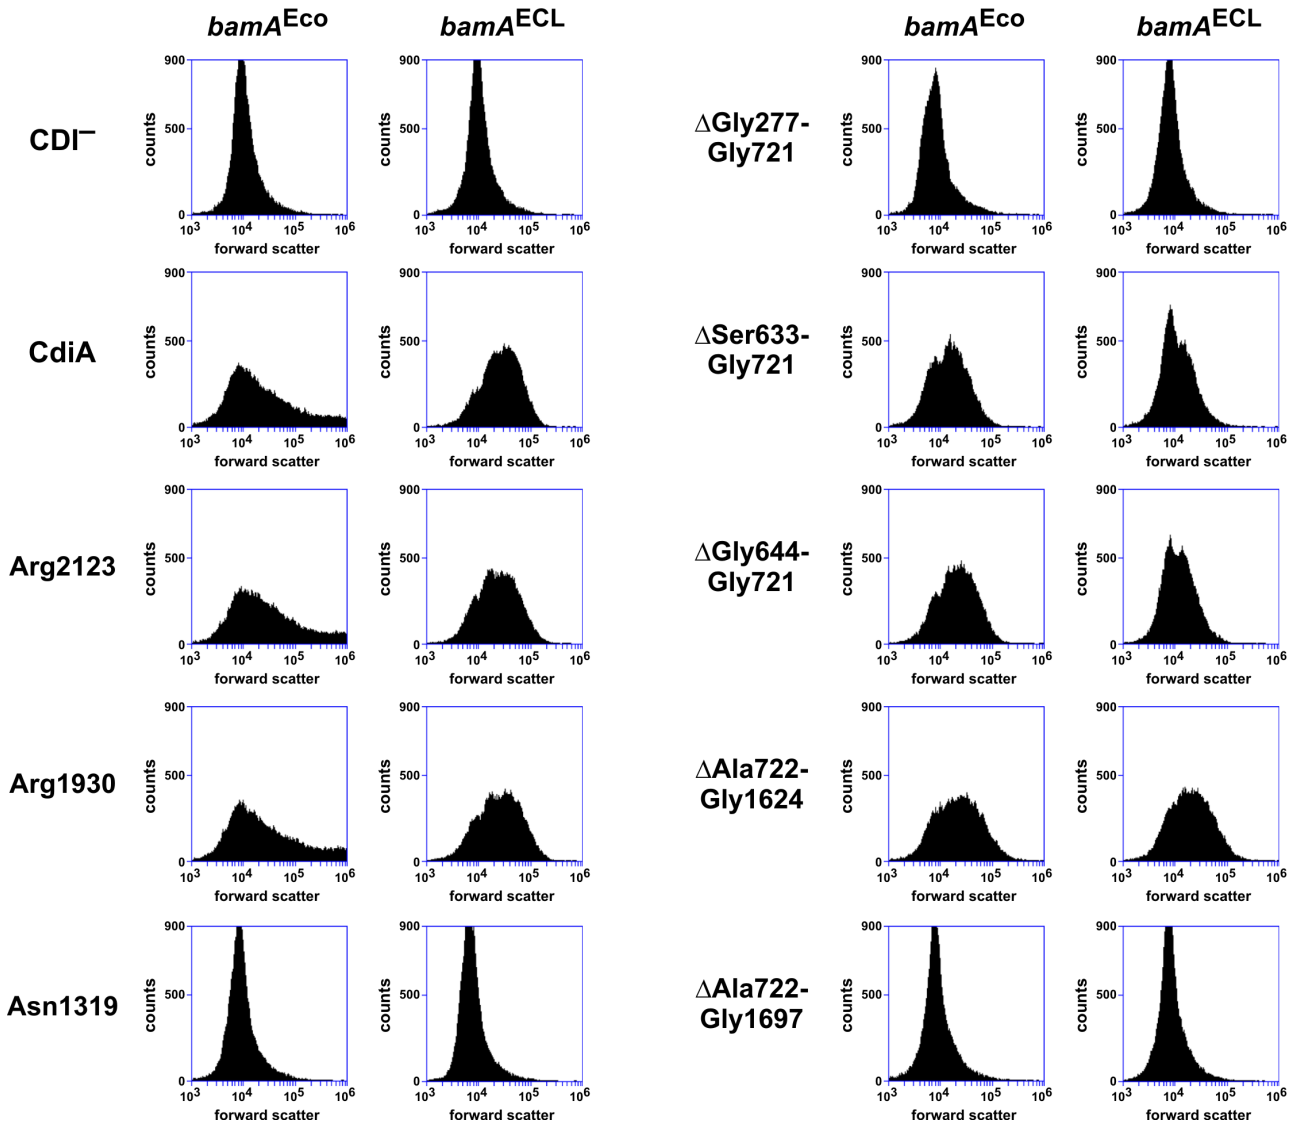

# Figure S4

CDIA\_ECOLX 1 1-----MHQPPVRF TYRLLSVLSVAIIAGQFLLPVAGV ITPQAGMDKAAANGVVPVNI 54  
Q2SV12\_BURTA 1 MNKNHYRLVFSRVHGLMVAVEETASSAGKASAGETRRRLDRSGVHVVTREALRFAAFAAL I AAGAMPMMVHAQ I VAGAPNAPSVIQTPNGLPQVNI 96

CDIA\_ECOLX 55 ATPNGAG I SHNRF TDYVNGKEGL LNNA TGKLNPTQLGGL IQNNPNLKAGGEAKGI I NEV TGGKRSLLQGYTEVAGKAAANVMVANPYGI I TCDGGCF 150  
Q2SV12\_BURTA 97 NKPGGAGVSLNTYQFDFVSHAGA I LNNSTPTIVN TQAGY I INGNPLNSAGQAAARI I VNOVNS TAAASQ I KGYVE I AGSRAE I V L ANPAG I VV DGGGF 191

**TPS domain**

CDIA\_ECOLX 151 I NTPHATL TTGKPMVNADGSLQALEVTEGSI I TINGAGLDGTRSDAVSI I IARA TEVNAAL HAKDLTV TAGANRI I TAGD-RV SALKGEENVPKVAVDI 245  
Q2SV12\_BURTA 192 I NTSRAVL TTGVPQFGADGSL TGFVNVRGLVTVQAGLD TSNVQDQDI I IARAVHANAAI YAKNLNV IGGTQVNHDTLAWTQ I AGDGPAPA VAI I DV 287

CDIA\_ECOLX 246 GALGGMYARR I HLTSTESGVGVN-LGNLYAREGDI I I SSSGKLV LKNSLAGGNTTV TGDVSLSGDNKAGGNLSV TGT TGL - - - - - TLNQRSLV TD 335  
Q2SV12\_BURTA 288 AQLGGMYANRVFLVGN SAGVGVANAGT I AAQAGDL T LQSNRGLV L TGKTTAS - - - - - GNMALSAAGG IQNSGTTYAQQS L SAS 365

CDIA\_ECOLX 336 KNLVLS SSGQ I VQNGGEL TAGQNAML SAQHLNQ - - - - - TSGTVNAAENVL TTTDDTTLKGRS VAGKTL TVSSGSLNNGGTLVAGRDA - - - - - 418  
Q2SV12\_BURTA 366 TSA - - - - - DL TNSGTLAAQONTAVNAGSVNSTGL TLAGAVVNDGVT HSGDLNLTASGLTATAGQNVAGGNASL TGGVSNLRVQA TAANGNLSL N 454

CDIA\_ECOLX 419 - - - - - TVKGTGF NNTGTVQGNGLKVTA TDL TSTGSI KSGSLD I SARN-ATL SGGDAGKDRAL VTVSGTLEN-RGR LVSDDVLTLSAT-Q I NNSG 505  
Q2SV12\_BURTA 455 ATAGDVNLSNMTSAQA I QAK - - - - - AASTVI INDHGSLSSGGSTL TGGSLSNQSGKVSQGPLSVNVAQ I ANQSGELVSESTADVHGA I ANNGG 547

CDIA\_ECOLX 506 T LSGAKELVASADLT TTEKESVTNSDNLMLDSA - - - - - SSTLAGE T - - - - - SAGGTVSVKGNLSKTT - - - - - TTAQTOGNSVSVVQNAQLD 583  
Q2SV12\_BURTA 587 TLQSAAGM TVAGASLDN TAGRI I TSLNDGLSVTTSGQL TNVAGTTANGAQGGV I GNGDVSQGANVNRGA I TSNLNLRVSNQSGT I - - - - - DNG - - - - - S 637

CDIA\_ECOLX 584 GTQAARD I L TLNASEK I THSGKSSAPSL SLSAPEL TSSGVL VGSALNTQSQTL TNSGLLQKQKASL TVNTQRLDNQNGTLYSAADL TLDIP I RNS 679  
Q2SV12\_BURTA 638 GTLQAQKVAVDAGARL I - - - - - INNGS I VQGTAL TGT TLDNSAG - - - - - VVQADQVSLNATDLVNH 695

CDIA\_ECOLX 680 GLITGDN - - - - - GLM-LNA - - - - - VLSNPGKI I ADT - - - - - LSVRATTL-DGDD - - - - - LLQAGALALAGD T LSLGNSRRLW TAGDLSLRKTLHTAGT TQGGNL 764  
Q2SV12\_BURTA 686 GGT I TGTGAGAMSVN VSGTLENSNGGTLQNSNDL - - - - - LAGNGLT LGGG TGSVNVG - - - - - GS I ASNRVVAQTAL - - - - - 781

CDIA\_ECOLX 765 TVQADRWANS SSVQA TGNLTASATGQL TSTGDI MSQGD T TLAATTDNRGSLLSAGT LSLDGNL D N S G T V Q G N - - - - - HV T I R Q N G V T N S G T L T G I A A 858  
Q2SV12\_BURTA 782 - - - - - NN TAGS I NAQNG LAA TVGGT L - - - - - NNANGLKLSNTDLSV TSGT L S N D G G Q I G A S A N A T I R T G S M T N Q G G S I V A P N 853

CDIA\_ECOLX 859 I TLAARMDMASPPALMNNGSL TSGDLTI TAGSLANSA IQA - - - - - DSL TARLTGELV - - - - - STAGSKV TSN - - - - - 925  
Q2SV12\_BURTA 854 LSVTA - - - - - DS TLDNSGGKLEANGLAL TATNLVNHGGTI TQYGSAMMNVSGT L D N S A A G V I Q T N A A D L T L A P A E L N N A G G T I T H A G T G L 941

CDIA\_ECOLX 926 - - - - - GEMALSALNLSNGQWIAKNLTK KANSLTSAGDI TGVDA L TL TVNQTLNHNASGKLLSAGVL TLKADSVKN D G L Q G N A T T 1006  
Q2SV12\_BURTA 942 TIAPGNGASALNNASGT I VTKGQAVNAAWNNASG I LAAQ - - - - - RG I N A T I T G D V N N - T Q L R S D A S L - - - - - S L K N G G A L S N R G G H 1020

CDIA\_ECOLX 1007 I TAGQLTNGGHLQGL T L T L A A S G - G V N N R S G G V L M S R N A L N V S T A T L S N Q G T I Q G G G V S L N A T D R L Q N D G K I L S G S N L T L T A Q V L A N T G S G L V Q A 1101  
Q2SV12\_BURTA 1021 I QAQQLVAG - - - - - DSS T L A I E S T S I D N A D G - A I V D L G - - - - - A - - - - - G K M T V Q G G S Q I A N S H A S G V A G M G A I T G N G D L V T S A A S I S N T Q S - - - - - 1096

CDIA\_ECOLX 1102 A T L L L D V V N T V N G R V L T A G S A D V K G T L L N N T G T F Q G A D L L V N Y H T F S N S G T L L G T S - - - - - G L V K G S L L Q N G T G R L Y S A G N L L D A Q D F S G G 1192  
Q2SV12\_BURTA 1097 - - - - - G Q L S G A S L H V Q G N T L D N S G G T I G N V T N S G D V D V K T I G A I T N T N Q Q I S S T H D L S V A A T L Q G G G 1160

CDIA\_ECOLX 1193 QVVA T G D V T - - - - - L K I A A L T N H G T L A A G K T L S V T S Q N A V T N G G V M Q G D A M V L G A G E A F T N N G T L T A G K G N S V F S A Q R 1266  
Q2SV12\_BURTA 1161 T Y S A T H D A N V N L Q G D Y T A A S D T Q F N V G H D L A F T L P G T F T N N A N L Q S V N N L S V N A G I V N V G A L T A G G L L - H T Q S T N I N T G A L V - - - - - 1243

CDIA\_ECOLX 1267 L F L N A P G S L Q A G G D V S L N S R S D I T I S G F T G T A G S L T M N V A G T L L N S A L I Y A G N N L K L F D R L H N Q H G - - - - - D I L A G N S L W - - - - - V Q K D S S G T 1350  
Q2SV12\_BURTA 1244 - - - - - G A S A S L N A N T I S N L G P T A L I G A S D - - - - - S N G T L E I L A H D I E N R D D T A T D S M A T T A I F G M G K V L G G G K D A S G N 1314

CDIA\_ECOLX 1315 -ANSE I I NRSNG I E T T R G D I T M N T A H L L N S W D A I S A S - - - - - H E V I P G S S H G V I S P V P E N N R W G V V R H D G V E Y L A V Y 1404  
Q2SV12\_BURTA 1315 I T Y N A A L V N N S A L I Q S E G D M E L H A D K I T S T R R V M K T S T S A I D P S L L G Q F G I P I S G R T G Q V G V K D P D S I G G V Y T E P H G G W N S T Y Q - - - - - F T T Y 1422

CDIA\_ECOLX 1423 W G K G A T V P D E Y R I R T G D T E T V T V S A S G H A A R I S G G A D M H I R A G R L D N E A S F I L A G G M T L S G D T L N N Q G W E G T - - - - - T G K 1499  
Q2SV12\_BURTA 1405 Y A D S A T A T T V D I - - - - - S P A A Q I V S G G K I D A S S V G T L Q N Y W S N I A A V G D I K M P - A R Y D A D G W A A S G Q N L P G V S V S Y S G Q Y H N Y N D N T 1487

CDIA\_ECOLX 1400 E T V W R L A S G S L P K A W F T E P W Y K V Y R Q V S P D A T E A S G T P G V R A V I S A A G D V S A S F A T D T G N T V M P R A G G A G N T I V P S L N S - - - - - L T P P 1587  
Q2SV12\_BURTA 1488 E H D W L P F G A N P F V T G R - - - - - P G G V T Q A A P A S I V T G R - - - - - K L P G F V S T M S S N G T I S G T - - - - - G V S V S N - - - - - T A G N A S I S N G L L P G G S V P G L T P T 1567

CDIA\_ECOLX 1588 T V S Q G V S G E A L L N E S G T G - I T G P V W D A L P D T L K D I P G A L S L S G A S V S S Y P L P S G N N G Y F V P S T D P S P Y L I T V N P K L D G L K G V D S S L F A G Y L D L L 1682  
Q2SV12\_BURTA 1568 N L S G N A S G A - - - - - K S G A S A V H G G - - - - - Q S A P V D P I - - - - - I A S A T A L N V L N N L T I P G G L Y R P T T A P N A S Y - - - - - 1625

CDIA\_ECOLX 1683 R M Q P G E A P R E T D P A Y T D E K Q F L G S S Y I L D R L G L K P E K D Y R F L G D A A F D T R Y V S N V I L N Q T G S R Y I N G T S D L A M Q M Y L M D S A A Q Q K A L G L T F G V S 1778  
Q2SV12\_BURTA 1626 - - - - - V I E T N P A F T N Q K N F I S S D Y F F G L G V D F H I P K R L G D G F E D Y N E V T S L T G K A V L G P Y A D L E T M Y Q L M A A G A D L S K S L D L P I G A 1714

CDIA\_ECOLX 1779 I T A G Q V A Q L T R S L L W W E S V T I N G Q T V M V P K L Y L S P E D I T L H N G S V I S G N N V Q L A G G N I T N S G S S I N A Q N D L L D R T G S I D N L N A G L I N A G G A L N L K 1874  
Q2SV12\_BURTA 1715 L S A D Q V S K L T S N V Y M M E T R V V D G Q S V L V P V Y L A K A S Q Q N I D E P L I S A T N V D F Q N A Q S F T N S G T I K A D N T L A I Q G K - Q I D - N A F A L Q S G G L M S L K 1808

CDIA\_ECOLX 1875 A I G D I G N I S S V I S G K T V S L E S A T G N I S N L - T R T E Q W A M N N G Y N H S F Q T D T G P L A A V R A T D S L F M G A A G D I S I T G A A V S A G D S V L L A A G N D L M N M A I 1969  
Q2SV12\_BURTA 1809 T E N N V D L S A N V K A G S L Q L D A G K D L L D T A K T N T R V S R D G A S - V V T L G P T A K L D V A G D A S I T T G N F Q Q N A G L S V G G N L M N V G N W D L G A V 1903

CDIA\_ECOLX 1970 Q A G E R R R Y G G S G W Y E T - - - - - H A V A P T V T A G N S L M L S A G R D V N S Q A A G I T A E N S M D I R A G R D V N M A - - - - - A E S T G A G D H S T F S M K T V H D - S 2051  
Q2SV12\_BURTA 1904 T G E H K I V Q R A N G V S N T D I N K V T G S S V T V G Q S S I G V G G D L T A K G A Q I D L G Q G G T A A K G N V T L G A A S A T S T R N S S S G S D S H G - S Y A - E T L H T S D 1997

CDIA\_ECOLX 2052 V R Q Q G T D M T S G D I T V T A G R D I T S V A T A V - T A K G D I R V N A G H D I V L G T A T E S D Y H Y S E S G E T R N R L L S H O T T R I T E D S V T R E K S L L S G N R V N 2146  
Q2SV12\_BURTA 1998 Q A L T G T T F K G D V G I L A A Q N V T V N A A Y D T Y K D A G F Q Q S K S G L V G L G G L V L G S Q M A G A V R Q G Q S G D S R L A A V Q A V A A E Q A Y N L R G G I K D A A N 2187

CDIA\_ECOLX 2147 A G N N L T V Q G S D V V A D R D V S L A A D N H V D V L A A T S T D T S W R F K E T K T S G L T G T G G I G F T T G S S K T T H R R E A G T T Q S Q S A S T I G S T A G N V S I T A G K O A 2242  
Q2SV12\_BURTA 2094 S N R D I N V A G S N V G T N D V T L Q A T R N V N I T T S Q D T T Q S S Y F D K E S G L L T N G G L S V T V G S R S A A Q Q D Q - - - - - S S V T N K G S V I G S S G N V T I Q A G K O A 2187

CDIA\_ECOLX 2243 H I S G S D V I A N R D I S I T G D S V V D P G H R R T V D E K F E Q K S G L T V A L S G A V G S A I N N A V T M A R E A K E T S D R S L A A L K G T A A V L S G V Q - - - - - A G V - - - - - N 2332  
Q2SV12\_BURTA 2188 T I T G S T I V A G Q D V G I A A Q N V T V N A A Y D T Y K D A G F Q Q S K S G L V G L G G L V L G S Q M A G A V R Q G Q S G D S R L A A V Q A V A A E Q A Y N L R G G I K D A A N 2283

CDIA\_ECOLX 2333 H G L Q Q S A D P N N G I G V S I S L N H Q Q S K S E T K Y Q H D I V S G S T L S A G N V S V T A T G K N K D H - - - - - N N S G D M L I T G S Q I K S G N D T S L N A Q N D I L L A A A D 2424  
Q2SV12\_BURTA 2284 A L S N G N V S E A A K G V Q F S I G S S H S S N A T T S I S S A K G S S I I G N G N V S I T A T G T P D A N G A Q A G T E N I A M T G A S V - L G K N V L D A N N A I L Q A S A Q 2378

CDIA\_ECOLX 2425 T R O T T G K N S S K G G V G V S F G G T N G G L S I F A G I N S E G R E K G N G T W T E T T L D A G K N V S L T S G R D T T L S G A O V S G E K V V T A D V G N N L T I S S L Q D S 2520  
Q2SV12\_BURTA 2379 T E Q S T S S N S S T G W N A G V A I G V G K N - T B I S V F A N G S N K G O G N S G D V T O T N T V A A G N L T M K S G G D T T L S G A K V D K Q V T A D V G D L T M T S L Q D T S 2473

CDIA\_ECOLX 2521 R Y D S R Q N R V A A G G S F T F G S M S G S Y A S I S Q D K I S N Y D S V R E Q S G I Y A G K D G F D V T V G N H T Q L N G A V I A S T A T D D K N S I N T N T L G W S D I H N Q A D Y K 2616  
Q2SV12\_BURTA 2474 N Y S S N Q H N T G V S G S F T F G Y G G G - V D A S I G H T S I D A N Y A S V N Q Q T G I V A G K E G F D V N A G H T Q L N G A Q I A S A A P A D S N T L T G S L G F T D I Q N K M S Y S 2568

CDIA\_ECOLX 2617 A S H T G I S L S G G S G M S A S Q M V A S N A I A G A A N A L T G M S G S S G H A E G T T S S A I S G G N I I R N K - E S Q K Q D I A G L S R D P E N A N G S I A P E F D R E K E Q K R L Q 2711  
Q2SV12\_BURTA 2569 G S E G F S T S G Q P S F A Q T G D S A - - - - - S G V T R A A S V P A K I V V K S D E Q N G T D S T A G L S R D T A N A N G S I A P E F D R E K E Q K R L Q 2643

CDIA\_ECOLX 2712 E A Q V I S Q I S G Q M S N I V M T Y G E T E A M K A A R K E H P G M S D A Q L R E T P E Y R E V M K G Y G T E S T P Q M V V Q A I T G V L G L N A G N P Q V L A G G L N P A V A Q L I K Q 2807  
Q2SV12\_BURTA 2644 F A Q A F G K V - - - - - A - - - - - T F A V A E A A T Q L E N S - - - - - S P Q M K A L F G E G G A G R D A - - - - - L H A A V A A I G A A L S G G N I G G A V A G S L A G D V L Q S L A Q 2718

CDIA\_ECOLX 2808 A T G D N R E A N L - - - - - M A H A V W G A L A Q L G G N N A A - - - - - S G A A G A F S G E L A A R Y I I D N Y Y G G R T D - - - - - N L S E Q E R - - - - - 2869  
Q2SV12\_BURTA 2719 P I I D O T V S Q L P L S A Q A A R N A L N E I V A T G G A A A G A V A G G G S S G A L A G A G S - - - - - A V N N E L Y N R Q L H V E E V K V V E Q L A K E A Q A V C R G D S S C V A K A T T 2812

CDIA\_ECOLX 2870 Q Q I S M L A T I A S G I A G G L V G N S T S A A - - - - - G T G A Q A G R N S V E N N A M S G L E G F G T G F Q S Y V A Q E A - - - - - L V - N N T N L D K N G K V L N P A T P E E I K 2953  
Q2SV12\_BURTA 2813 Y W T D M L E R A A K - - - - - G M V D D T A N K E N M A Y L Q T L I Q T A N N P T S E G A M G L S S Y L T N L Q T A Q D M L S Q Y M G K P I L V R G S P I I S D G S A Q T Y F S A T P E Q R S 2904

CDIA\_ECOLX 2954 Y A S D K L V T G S I P E G Q D P A R G - - - - - L L - - - - - I S W A G S V F G G E L I A P A V G T V A V I G G T L G G T T D A V Q K I T L P K P E Q Y S T T D T L I A A 3033  
Q2SV12\_BURTA 2905 N Q S L T A I L S G L P G S I V P G A S O R D Q S R V D S F A T Q N G S V K P D Y T I E E T V I G G L I N K I S I A S T A A R V G E S - - - - - I D V W L A - - - - - G - - - - - P V N P T 2982

CDIA\_ECOLX 3034 G E G L T A Q G K V I F S T F I N T M G A Y I G S K A K S - - - - - E D P T G P M V G N A I G T A L G N K A G D K F T K E M L S R G F S V T S E V T G T - - - - - 3106  
Q2SV12\_BURTA 2983 K G F I S T G K V T M E - - - - - S M P V K L N T A E Q V L S Q L D Q L P S K D L Q G A R - - - - - E Y V A N - - - - - N Y F V R N G F T P L D G K C G A N C F D G V Y V K G N T V Y V N E V 3065

CDIA\_ECOLX 3107 - - - - - V T G S V I G T V T D Y Q I E K L G K G N K E G - A K - - - - - 3132  
Q2SV12\_BURTA 3066 K P L N E S G S I S L N P P N S A T G L P C Q T D N W V A S V Q R L K D T G D P G L I K T A E V V E Q A F R N G L V K T V S G V N S N G M V V K V P R N T P 3147

**Table S1. Oligonucleotides**

| <b>Oligonucleotide</b>   | <b>Description<sup>a</sup></b>                                                       | <b>Reference</b>               |
|--------------------------|--------------------------------------------------------------------------------------|--------------------------------|
| $\Delta$ cdiA-dn-Eco     | 5' - TTT <u>GAA TTC</u> TAA TAA GGA AGG GGC AAA<br>ATG AAG                           | (Ruhe <i>et al.</i> ,<br>2013) |
| $\Delta$ cdiA-dn-Xho     | 5' - TTT <u>CTC GAG</u> CGT CAG ATC TTT ACC GAT<br>ATT CG                            | (Ruhe <i>et al.</i> ,<br>2013) |
| $\Delta$ cdiA(CT)-up-Sac | 5' - TTT <u>GAG CTC</u> GAT GAA AGC AGC CAG GAA<br>AG                                | This study                     |
| $\Delta$ cdiA(CT)-up-Bam | 5' - TTT <u>GGA TCC</u> TAT GCA TTA TTC TCA ACC<br>GAG TTC                           | This study                     |
| EC93-cdil(KO)-Sac        | 5' - TTT <u>GAG CTC</u> AGG AAA TTA AGT ACG CCT<br>CTG ATA AGC                       | This study                     |
| EC93-cdil(KO)-Bam        | 5' - TTT <u>GGA TCC</u> TAT TTT GCC CCT TCC TTA TTA<br>CCT TTT C                     | This study                     |
| EC93-cdil(KO)-Eco        | 5' - TTT <u>GAA TTC</u> GTT GTT GTT GAG AAT AAC<br>TCG CTG AG                        | This study                     |
| EC93-cdil(KO)-Xho        | 5' - TTT <u>CTC GAG</u> TCC AGT ATT TTC CAC TAC<br>CAT CTG G                         | This study                     |
| gfp(mut3)-Bam-for        | 5' - TTT <u>GGA TCC</u> AAG GAG ATA TAC ATA TGA<br>GTA AAG GAG AAG AAC TTT TCA CTG G | This study                     |
| sfGFP-rev-Bam            | 5' - TTT CTG CAG <u>GAT CCT</u> TAT TTG TAG AGC<br>TCA TCC ATG CC                    | This study                     |
| dsRed-Eco-for            | 5' - TAA <u>GAA TTC</u> CAC ACA GGA AAC AGC                                          | This study                     |
| dsRed-Xho-rev            | 5' - TCG <u>CTC GAG</u> CTA CTG GAA CAG GTG G                                        | This study                     |
| EC93cdiA-V33-Spe-for     | 5' - TTT <u>ACT AGT</u> GTC ATC ACC CCA CAA AAC G                                    | This study                     |
| EC93cdiA-G285-Xho-rev    | 5' - CAG <u>CTC GAG</u> TTA TCC GGA ACT GCT CAG                                      | This study                     |
| pgaA-for                 | 5' - CAG AAA AAG GTG CCC GAA AAC C                                                   | This study                     |
| pgaA-rev                 | 5' - GCA ATC TGT AAC CAG TCA GCA ATT TGG                                             | This study                     |
| wcaA-for                 | 5' - CTG GAA CCG CCA ACA ACT GG                                                      | This study                     |
| wcaA-rev                 | 5' - AGC ATA ATC GCC TGG TTA CGT ACC                                                 | This study                     |
| bcsA-for                 | 5' - TGA CCC GGT GGT TGC TTA TCC                                                     | This study                     |

|                |                                                             |            |
|----------------|-------------------------------------------------------------|------------|
| bcsA-rev       | 5' - GCG AGG CGT TGA TAT GCG G                              | This study |
| fliC-for       | 5' - GCA CAA GTC ATT AAT ACC AAC AGC CTC                    | This study |
| fliC-rev       | 5' - GCG CTG TTA ATA CGC AAG CCA G                          | This study |
| lac-Sac-for    | 5' - TTT <u>GAG CTC</u> GGT TTC CCG ACT GGA AAG CGG         | This study |
| lac-OE-rev     | 5' - GCA TAT TCT CCT CGT GGG GTG TGA AAT TGT TAT CCG CTC AC | This study |
| cdiB-OE-for    | 5' - GTG AGC GGA TAA CAA TTT CAC ACC CCA CGA GGA GAA TAT GC | This study |
| cdiB-Sac-rev   | 5' - TTT <u>GAG CTC</u> GGA TTT GCT GCA GCC TGC             | This study |
| lacI-Eco-for   | 5' - TTT <u>GAA TTC</u> ACC ATC GAA TGG TGC AAA ACC         | This study |
| CDI-up-Xho-rev | 5' - TTT <u>CTC GAG</u> TCA CTG CCC GCT TTC CAG TC          | This study |
| CDI-up-Kpn-for | 5' - TTT <u>GGT ACC</u> GCG CGA TAA TTT CTT TCA GCC         | This study |

## Reference

Ruhe, Z. C., A. B. Wallace, D. A. Low & C. S. Hayes, (2013) Receptor polymorphism restricts contact-dependent growth inhibition to members of the same species. *mBio* 4: e00480-00413.
